# Supplementary material
Source: Research Square preprint supplement (doi:10.21203/rs.3.rs-9163172/v1)

**Graphical abstract**

**
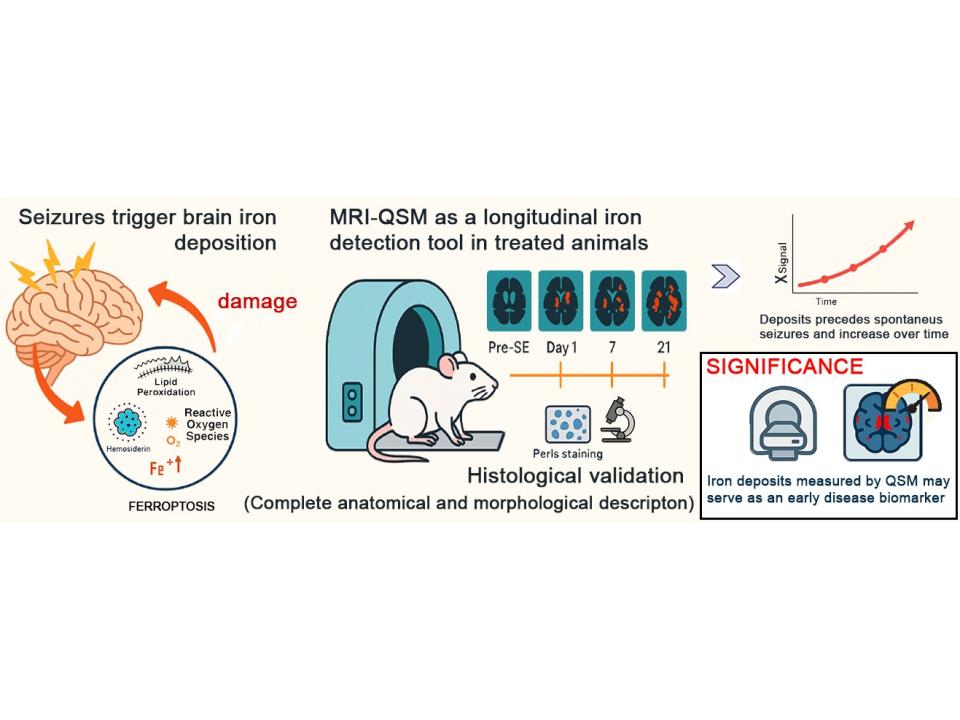
**

Supplement: Supplementary file 1 [file 4131a98e603a0f943919ab63.docx]
